# Supplementary material
Source: MDPI journal article supplement (https://www.mdpi.com/2073-4441/7/6/2728)
Supplement: s1 [file s1]

# Supplementary Materials

**Table S1.** List of studied documents relevant to the benefit sharing in the water and land resources development in the Ferghana Valley.

| Chronological order of the document | Document <sup>1</sup>                                                                                                                                                                                                                                                             | NO.  | Date              | Relevance to (Present) Benefit Sharing <sup>2</sup> | Type [4] of Benefits <sup>3</sup> |
|-------------------------------------|-----------------------------------------------------------------------------------------------------------------------------------------------------------------------------------------------------------------------------------------------------------------------------------|------|-------------------|-----------------------------------------------------|-----------------------------------|
| 1.                                  | Decree on Land adopted by the 2nd All-Russian Congress of the Soviets of Deputies of Workers, Soldiers and Peasants                                                                                                                                                               |      | 27 October 1917   | Property rights for land, borders                   | 2, 4                              |
| 2.                                  | Resolution of the Council of People's Commissars of the Union of Soviet Socialist Republics (USSR) on provision of the pastures for the livestock of the Ferghana group of districts of the Uzbek Soviet Socialist Republic (SSR). Osh province Water Management Department (WMD) | 1313 | 27 June 1935      | Pasture exchange, borders                           | 2, 4                              |
| 3.                                  | Resolution of the Council of People's Commissars of the Kyrgyz SSR on provision of kolkhozes of the Uzbek SSR in the Ferghana Valley with pastures in the Kyrgyz SSR                                                                                                              | 1337 | 19 September 1939 | Pasture exchange, borders                           | 2, 4                              |
| 4.                                  | Resolution of the Council of Ministers of the USSR on consolidation of the pastures under State Custody for the kolkhozes of the Uzbek, Kazakh, Kyrgyz and Tajik SSRs and their reclamation                                                                                       | 1509 | 09 July 1946      | Pasture exchange, borders                           | 2, 4                              |
| 5.                                  | Order of the Ministry of Land Reclamation of the USSR on consolidation of the pastures under State Custody for the kolkhozes of the Uzbek, Kazakh, Kyrgyz and Tajik SSRs and their reclamation                                                                                    | 426  | 22 July 1946      | Pasture exchange, borders                           | 2, 4                              |
| 6.                                  | Law of the USSR on agricultural tax                                                                                                                                                                                                                                               |      | 08 August 1953    | n/a                                                 | n/a                               |
| 7.                                  | Resolution of the Council of Ministers of the USSR on unified state accounting of lands                                                                                                                                                                                           | 2529 | 31 December 1954  | n/a                                                 | n/a                               |
| 8.                                  | Order of the Ministry of Agriculture of the USSR on consolidation of pastures under the State Land Fund for the kolkhozes of the Uzbek, Kazakh, Kyrgyz, Tajik and Turkmen SSRs                                                                                                    | 623  | 31 December 1955  | Pasture exchange, borders                           | 2, 4                              |
| 9.                                  | Resolution of the Council of Ministers of the USSR on the order of design and construction of reservoirs and hydropower stations                                                                                                                                                  | 1251 | 07 September 1956 | Increased autonomy in decision making               | 2, 3                              |
| 10.                                 | Decree of the Presidium of the Supreme Council of the USSR on liability of non-fulfillment of plans                                                                                                                                                                               |      | 24 April 1958     | n/a                                                 | n/a                               |
| 11.                                 | Resolution of the Council of Ministers of the Kyrgyz SSR on redistribution of the lands of the sovkhoz "Chatkal" to kolkhozes and sovkhozes of the Uzbek SSR, Kazakh SSR, as well as Lenin and Kirov districts of the Kyrgyz SSR                                                  | 201  | 17 April 1959     | Land exchange, borders                              | 2, 4                              |
| 12.                                 | Protocol of the Meeting of the representatives of the Uzbek and Kyrgyz SSRs on water shares on Aravansai and Akbursai systems                                                                                                                                                     |      | 25 May 1961       | Water sharing                                       | 2                                 |
| 13.                                 | Protocol of the Inter-republican and Inter-province Meeting on water allocation issues of the Isfayramsai and Shakhimardansai STTs                                                                                                                                                |      | 21 July 1961      | Water sharing                                       | 2                                 |
| 14.                                 | Protocol of the Inter-republican Meeting of the representatives of the Kyrgyz and Uzbek SSRs on water allocation issues of the Karadarya river system                                                                                                                             |      | 18 July 1962      | Water sharing                                       | 2                                 |

Table S1. Cont.

| Chronological order of the document | Document <sup>1</sup>                                                                                                                                                                                                                                                     | NO.    | Date              | Relevance to (Present) Benefit Sharing <sup>2</sup> | Type [4] of Benefits <sup>3</sup> |
|-------------------------------------|---------------------------------------------------------------------------------------------------------------------------------------------------------------------------------------------------------------------------------------------------------------------------|--------|-------------------|-----------------------------------------------------|-----------------------------------|
| 15.                                 | Internal Note on the issue of the Kampyr-Ravat (Andijan) reservoir for the flow regulation of the Karadarya river                                                                                                                                                         |        | 24 July 1962      | Water sharing                                       | 2                                 |
| 16.                                 | Letter for approval from Uzbek SSR to Kyrgyz SSR for construction of the Kampyr-Ravat (Andijan) reservoir                                                                                                                                                                 |        | 02 August 1962    | Increased water supply, water sharing               | 2                                 |
| 17.                                 | Resolution on the proposal of the Central Committee of the Communistic Party, Council of Ministers and Supreme Council of the Uzbek SSR on the construction of the Kampyr-Ravat (Andijan) reservoir in Uzgen district of the Kyrgyz SSR                                   | 45/8-B | 13 September 1962 | Increased water supply, water sharing               | 2                                 |
| 18.                                 | Letter to the Central Committee of the Communistic Party, Council of Ministers of the Uzbek SSR                                                                                                                                                                           | 6/21   | 26 September 1962 | Increased water supply, water sharing               | 2                                 |
| 19.                                 | Letter to the Central Committee of the Communistic Party, Council of Ministers of the Kyrgyz SSR                                                                                                                                                                          | 252-33 | 08 January 1963   | Increased water supply, water sharing               | 2                                 |
| 20.                                 | Order of the Council of Ministers of the USSR on the approval of the project document of the construction of the Kampyr-Ravat (Andijan) reservoir                                                                                                                         | 511-P  | 15 March 1963     | Increased water supply, water sharing               | 2                                 |
| 21.                                 | Protocol of the Inter-republican Meeting on the construction of the second stage of the Kirkidon (Karkidon) reservoir                                                                                                                                                     |        | 20 February 1964  | Increased water supply, water sharing               | 2                                 |
| 22.                                 | Conclusion of the Osh province WMD on the scheme of use of the water resources of the Karadarya river basin taking into account the Kampyr-Ravat (Andijan) reservoir                                                                                                      |        | 18 August 1964    | Increased water supply, water sharing               | 2                                 |
| 23.                                 | Protocol of the Meeting under the Director of the State Design Institute on Land use “Uzgiprozem”                                                                                                                                                                         |        | 12 February 1965  | Increased water supply, water sharing               | 2                                 |
| 24.                                 | Decision on the withdrawal of the lands from the land users in the Uzgen and Karasu districts for the construction needs of the Kampyr-Ravat (Andijan) reservoir                                                                                                          | 285    | 11 May 1965       | Increased water supply, water sharing               | 2                                 |
| 25.                                 | Internal Note of the Council of Deputies of Osh province of the Kyrgyz SSR on the Decision #285 11 May 1965 on the withdrawal of the lands from the land users in the Uzgen and Karasu districts for the construction needs of the Kampyr-Ravat (Andijan) reservoir       |        | 11 May 1965       | Increased water supply, water sharing               | 2                                 |
| 26.                                 | Proposition on additional measures to mitigate low water conditions in the Syr Darya and Karadarya river basins                                                                                                                                                           |        | 18 June 1965      | Water sharing                                       | 2                                 |
| 27.                                 | Protocol of the Meeting of the representatives of the Ministries of water management of the Uzbek and Kyrgyz SSRs, Design institutes “Sredazgiprovodhlopok” and “Kyrgyzgiprovodhoz” on use of water resources of the Kara-Darya river with Andijan/Kampyr-Ravat reservoir |        | 23 September 1965 | Increased water supply, water sharing               | 2                                 |

Table S1. Cont.

| Chronological order of the document | Document <sup>1</sup>                                                                                                                                                                                                                                                                                                                                                                                                     | NO.      | Date             | Relevance to (Present) Benefit Sharing <sup>2</sup>  | Type [4] of Benefits <sup>3</sup> |
|-------------------------------------|---------------------------------------------------------------------------------------------------------------------------------------------------------------------------------------------------------------------------------------------------------------------------------------------------------------------------------------------------------------------------------------------------------------------------|----------|------------------|------------------------------------------------------|-----------------------------------|
| 28.                                 | Resolution of the Council of Ministers of the Kyrgyz SSR on the allocation of the lands for the construction of Kampyr-Ravat (Andijan) reservoir                                                                                                                                                                                                                                                                          | 475      | 22 October 1965  | Increased water supply, water sharing                | 2                                 |
| 29.                                 | Protocol of the Meeting of the representatives of the Ministries of Agriculture of the Uzbek and Kyrgyz SSRs, Ministries of Melioration and Water Resources of the Uzbek and Kyrgyz SSRs with participation of representatives of the State Construction department of the Kyrgyz SSR, institutes “Sredazgiprovodhlopok”, Osh Oblvodkhoz on some issues related to the construction of the Andijan/Kampyr-Ravat reservoir |          | 12 November 1965 | Increased water supply, water sharing                | 2                                 |
| 30.                                 | Resolution of the Councils of Ministers of the Kyrgyz and Uzbek SSRs on some issues related to the construction of the Andijan/Kampyr-Ravat reservoir                                                                                                                                                                                                                                                                     | 559/656  | 11 December 1965 | Increased water supply, water sharing                | 2                                 |
| 31.                                 | Resolution of the Council of Ministers of the Uzbek SSR on the allocation of the lands in connection with the construction of the Andijan/Kampyr-Ravat reservoir                                                                                                                                                                                                                                                          | 659      | 15 December 1965 | Increased water supply, water sharing                | 2                                 |
| 32.                                 | Protocol of the Inter-republican Meeting on agreement on the Terms of Reference of the Left-shore canal with water intake from the upstream of the Uch-Kurgan Hydropower Station                                                                                                                                                                                                                                          |          |                  | Increased water supply, water sharing                | 2                                 |
| 33.                                 | Protocol of the Meeting of the representatives of the Ministries of Melioration and Water Resources of the Uzbek and Kyrgyz SSRs and the institutes Uzgiprovodkhoz and Kyrgyzgiprovodkhoz                                                                                                                                                                                                                                 |          | 12 July 1968     | Increased water supply, water sharing                | 2                                 |
| 34.                                 | Law of the USSR on the fundamentals of land legislation                                                                                                                                                                                                                                                                                                                                                                   |          | 13 December 1968 | Increased autonomy in dispute resolution             | 2, 3                              |
| 35.                                 | Protocol of the Commission on resolving the land-management issues between Osh province of the Kyrgyz SSR and Andijan province of the Uzbek SSR                                                                                                                                                                                                                                                                           |          | 07 December 1969 | Water sharing, land exchange                         | 2                                 |
| 36.                                 | Decision of the Executive Committee of the Council of Deputies of Osh province on construction of the Left-shore Naryn Canal and pump station of the Uzbek SSR on the territory of Lenin district of Osh province (Kyrgyz SSR) and partial implementation of the 1958 decisions of the Parity Inter-republican Commission of the Uzbek and Kyrgyz SSRs                                                                    |          | 08 December 1969 | Increased water supply, water sharing                | 2                                 |
| 37.                                 | Resolution of the Council of Ministers of the Kyrgyz SSR on the allotment of the lands in connection with resolving land-management issues between Osh province of the Kyrgyz SSR and Andijan province of the Uzbek SSR                                                                                                                                                                                                   |          | 08 December 1969 | Land exchange, increased water supply, water sharing | 2                                 |
| 38.                                 | Letter to the Secretary of the Communist Party of the Uzbek SSR on the compensation for the expenses related to the construction of the Andijan/Kampyr-Ravat reservoir                                                                                                                                                                                                                                                    | 110/10-c | 01 April 1970    | Land exchange, increased water supply, water sharing | 2                                 |

Table S1. Cont.

| Chronological order of the document | Document <sup>1</sup>                                                                                                                                                                                                                  | NO.     | Date                | Relevance to (Present) Benefit Sharing <sup>2</sup>                                        | Type [4] of Benefits <sup>3</sup> |
|-------------------------------------|----------------------------------------------------------------------------------------------------------------------------------------------------------------------------------------------------------------------------------------|---------|---------------------|--------------------------------------------------------------------------------------------|-----------------------------------|
| 39.                                 | Letter to the Secretary of the Communist Party of the Kyrgyz SSR on the compensation for the expenses related to the construction of the Andijan/Kampyr-Ravat reservoir                                                                | 1-204c  | 1970                | Land exchange, increased water supply, water sharing                                       | 2                                 |
| 40.                                 | Order of the Ministry of Agriculture of the USSR and the Ministry of Water resources of the USSR on the land reclamation development perspectives in 1971-1985, regulation and re-allocation of the runoff of rivers. Osh province WMD | 229/186 | 17 August 1970      | Water and land resources development across the region, priorities                         | 2, 3, 4                           |
| 41.                                 | Law of the USSR on the fundamentals of water legislation                                                                                                                                                                               |         | 10 December 1970    | Formalizing Schemes—Basin approach                                                         | 2, 3, 4                           |
| 42.                                 | Protocol of the Meeting of the scientific-technical council of the Ministry of Water resources of the USSR held in Moscow                                                                                                              |         | 22-23 February 1972 | Development of Scheme for the Syr Darya                                                    | 2, 3, 4                           |
| 43.                                 | Protocol of the Meeting of the Inter-republican Commission on regulation of the land-water management issues between the Uzbek SSR and the Kyrgyz SSR                                                                                  |         | 08 May 1972         | Water sharing, sharing and exchange of responsibilities, property rights of infrastructure | 2, 3, 4                           |
| 44.                                 | Letter from the design institute Sredazgiprovodkhlopok to the Council of Ministers of the Kyrgyz SSR on the Corrective Note to the Scheme of complex use of water resources of the Syr Darya basin. Osh province WMD                   | 52-1691 | 09 August 1972      | Development of Scheme for the Syr Darya                                                    | 2, 3, 4                           |
| 45.                                 | Letter from the Council of Ministers of the Kyrgyz SSR to the Gosplan of the USSR, State Experts Commission (SEC) and institute Sredazgiprovokhlopok. Osh province WMD                                                                 | 11-8/58 | 05 January 1973     | Development of Scheme for the Syr Darya                                                    | 2, 3, 4                           |
| 46.                                 | Resolution of the SEC of State Planning Committee (Gosplan) USSR on expertise of the Scheme of the complex use of the water resources of the Syr Darya river. Osh province WMD                                                         | 2       | 07 February 1973    | Development of Scheme for the Syr Darya                                                    | 2, 3, 4                           |
| 47.                                 | Letter from the Kyrgyz SSR to the Gosplan of the USSR, SEC and design institute Sredazgiprovodkhlopok                                                                                                                                  | 11-8/58 | 07 May 1973         | Development of Scheme for the Syr Darya                                                    | 2, 3, 4                           |
| 48.                                 | Report of the Minister of Water resources of the Kyrgyz SSR to the Government of the Kyrgyz SSR on the Resolution #2 (7/02/1973) of the SEC Gosplan USSR. Osh province WMD                                                             |         | 1973                | Setting national priorities                                                                | 2                                 |
| 49.                                 | Protocol of the Inter-republican Meeting on regulation of land-water management issues between Uzbek SSR and Kyrgyz SSR                                                                                                                | 325-p   | 07 June 1973        | Water and pasture sharing, increased water supply, sharing responsibilities                | 2, 3, 4                           |
| 50.                                 | Notes of the Ferghana province Executive Committee on the Protocol of the Inter-republican Meeting on regulation land-water management issues between the Uzbek SSR and Kyrgyz SSR                                                     |         | 07 June 1973        | Pasture sharing, increased autonomy                                                        | 2, 3                              |

Table S1. Cont.

| Chronological order of the document | Document <sup>1</sup>                                                                                                                                                                                                                        | NO.      | Date              | Relevance to (Present) Benefit Sharing <sup>2</sup>                                                | Type [4] of Benefits <sup>3</sup> |
|-------------------------------------|----------------------------------------------------------------------------------------------------------------------------------------------------------------------------------------------------------------------------------------------|----------|-------------------|----------------------------------------------------------------------------------------------------|-----------------------------------|
| 51.                                 | Letter of the Council of Ministers of the Uzbek SSR on the draft of the joint Resolution on approval of the Protocol of the inter-republican meeting on regulating the land-water management issues between the Kyrgyz SSR and the Uzbek SSR | 10/12-19 | 14 June 1973      | Water sharing, increased water supply, sharing responsibilities, property rights of infrastructure | 2, 3                              |
| 52.                                 | Internal Note on the draft of the joint Resolution of the Council of Ministers of the Uzbek SSR and the Council of Ministers of the Kyrgyz SSR “On the land-water management issues between the Kyrgyz SSR and the Uzbek SSR”                | 15-1/4   | 27 June 1973      | Water and pasture sharing, increased water supply, sharing responsibilities                        | 2, 3, 4                           |
| 53.                                 | Questions on land management from the Kyrgyz SSR to the Uzbek SSR                                                                                                                                                                            |          | 1974              | Land exchange, borders                                                                             | 2, 3                              |
| 54.                                 | Response Letter to the Letter from the Central Committee of the Communist Party of Uzbekistan and Council of Ministers of Uzbek SSR                                                                                                          | 37/344   | 1974              | Land exchange, borders                                                                             | 2, 3                              |
| 55.                                 | Reference Certificate of the Osh province WMD on Inter-republican water allocation issues between the Kyrgyz SSR and Uzbek SSR                                                                                                               |          | 1974              | Water sharing, increased water supply, sharing responsibilities                                    | 2                                 |
| 56.                                 | Reference Certificate of the Osh province WMD on provision of land for use by the Uzbek SSR in the territory of the Kyrgyz SSR                                                                                                               |          | 1974              | Land exchange, issue linkages with other sectors                                                   | 2                                 |
| 57.                                 | Reference Certificate of the Osh province WMD on the issues of Inter-republican land use between Osh province of the Kyrgyz SSR and provinces of the Uzbek, Tajik and Kazakh SSRs                                                            |          | 1974              | Pasture exchange, borders, livestock development                                                   | 2, 3                              |
| 58.                                 | Reference Certificate on the highest priority objects of water infrastructure in Osh province of the Kyrgyz SSR                                                                                                                              |          | 1974              | Water sharing, increased water supply, sharing responsibilities                                    | 2                                 |
| 59.                                 | Letter from the Kyrgyz SSR to the Minister of Agriculture of the USSR on the issues of Inter-republican land use between Osh province of the Kyrgyz SSR and provinces of the Uzbek, Tajik and Kazakh SSRs                                    |          | 1974              | Pasture exchange, borders, livestock development                                                   | 2, 3                              |
| 60.                                 | Letter from the Kyrgyz SSR to the Secretary of the Communist Party of the Uzbek SSR on the land-water management issues between Osh province of the Kyrgyz SSR and Ferghana, Andijan, Namangan provinces of the Uzbek SSR                    |          | 1974              | Land compensation, reconsidering water allocation                                                  | 2                                 |
| 61.                                 | Report on the results of the Meeting of the representatives of the Uzbek and Kyrgyz SSRs                                                                                                                                                     |          | 06 September 1974 | Water sharing, land compensation                                                                   | 2                                 |
| 62.                                 | Protocol of the Meeting on inter-seasonal water allocation of the Isfara river among the Tajik, Uzbek and Kyrgyz SSRs                                                                                                                        |          | 21 November 1974  | Water sharing, increased water supply, sharing responsibilities                                    | 2                                 |
| 63.                                 | Resolution of the Council of Ministers of the USSR on the order of implementing activities on preparation of the zones of flooding related to the construction of hydropower stations and reservoirs. Osh province WMD                       | 76       | 02 February 1976  | Compensation for the losses                                                                        | 2                                 |

Table S1. Cont.

| Chronological order of the document | Document <sup>1</sup>                                                                                                                                                                                                                                                                                                                                   | NO.      | Date                 | Relevance to (Present) Benefit Sharing <sup>2</sup>                               | Type [4] of Benefits <sup>3</sup> |
|-------------------------------------|---------------------------------------------------------------------------------------------------------------------------------------------------------------------------------------------------------------------------------------------------------------------------------------------------------------------------------------------------------|----------|----------------------|-----------------------------------------------------------------------------------|-----------------------------------|
| 64.                                 | Protocol of the Inter-republican allocation of runoff of the small rivers in the Ferghana Valley                                                                                                                                                                                                                                                        |          | 10 April 1980        | Water sharing, linking all water resources                                        | 2                                 |
| 65.                                 | Notes from the Kyrgyz SSR to the Protocol 10/04/1980 on Inter-republican allocation of the runoff of the small rivers of the Ferghana Valley                                                                                                                                                                                                            |          | 1980                 | Increased autonomy in decision making, water sharing, linking all water resources | 2                                 |
| 66.                                 | Response Certificate to the Notes made by the Kyrgyz SSR to the Protocol 10/04/1980 on Inter-republican allocation of the runoff of the small rivers of the Ferghana Valley                                                                                                                                                                             |          | 1980                 | Increased autonomy in decision making, water sharing, linking all water resources | 2                                 |
| 67.                                 | Letter from the Central Committee of the Communistic Party and the Council of Ministers of the Kyrgyz SSR on the unresolved land-water management issues between the Kyrgyz SSR and the Uzbek SSR                                                                                                                                                       | 133/10-c | 16 April 1980        | Water sharing, linking water resources                                            | 2                                 |
| 68.                                 | Letter from the Central Committee of the Communistic Party and the Council of Ministers of the Uzbek SSR in response to the Letter #133/10-c dd. 16/04/1980 on the land-water issues between the Kyrgyz SSR and the Uzbek SSR                                                                                                                           | BX-1-454 | 07 May 1980          | Water sharing, linking all water resources                                        | 2                                 |
| 69.                                 | Information on allocation of water resources of the small rivers of the Ferghana Valley between the Uzbek SSR and Kyrgyz SSR on irrigation                                                                                                                                                                                                              |          | 1980                 | Water sharing, linking all water resources                                        | 2                                 |
| 70.                                 | Theses to the Meeting on inter-republican water allocation between the Kyrgyz SSR and the Uzbek SSR                                                                                                                                                                                                                                                     |          | 1980                 | Water sharing, linking all water resources                                        | 2                                 |
| 71.                                 | Agreement on regulation of the issues of water allocation from the small rivers between Uzbek and Kyrgyz Republics through joint consideration of the water management departments of Ferghana and Osh provinces                                                                                                                                        |          | 28 August 1980       | Water sharing, linking water resources, sharing responsibilities                  | 2                                 |
| 72.                                 | Decision of the Executive Committee of the Council of Deputies of Osh province on the allocation of the lands for the construction of the Sokh reservoir, complex of industrial and civil buildings for it as well as for the objects being relocated from the flooding zone belonging to the land users of Batken and Frunze districts of Osh province | 440      | 28 August 1980       | Water sharing, linking water resources, sharing responsibilities                  |                                   |
| 73.                                 | Agreement on regulation of the issues of water allocation from the small rivers between Uzbek and Kyrgyz Republics through joint consideration of the water management departments of Andijan and Osh provinces                                                                                                                                         |          | 29 August 1980       | Water sharing, linking water resources, sharing responsibilities                  |                                   |
| 74.                                 | Notes of the Osh province Council to the refined scheme of complex use and protection of water resources in the Syr Darya basin                                                                                                                                                                                                                         |          | no date assumed 1980 | Further development of Scheme                                                     |                                   |

Table S1. Cont.

| Chronological order of the document | Document <sup>1</sup>                                                                                                                                                                                                                                                                    | NO. | Date                 | Relevance to (Present) Benefit Sharing <sup>2</sup>                                    | Type [4] of Benefits <sup>3</sup> |
|-------------------------------------|------------------------------------------------------------------------------------------------------------------------------------------------------------------------------------------------------------------------------------------------------------------------------------------|-----|----------------------|----------------------------------------------------------------------------------------|-----------------------------------|
| 75.                                 | Information on the farmlands in the Toktogul district, flooded by the Toktogul reservoir due to the construction of the hydropower station                                                                                                                                               |     | no date assumed 1980 | Water sharing, increased water supply, land compensation                               | 2                                 |
| 76.                                 | Information on the lands of the Kyrgyz SSR given for construction of reservoirs, canals and hydropower stations to other republics                                                                                                                                                       |     | no date assumed 1980 | Water sharing, increased water supply, land compensation                               | 2                                 |
| 77.                                 | Information on the lands of Osh province of the Kyrgyz SSR given to the Uzbek, Tajik and Kazakh SSRs for long-term use as pastures                                                                                                                                                       |     | no date assumed 1980 | Pasture exchange, land compensation                                                    | 2                                 |
| 78.                                 | Letter from the Osh province Executive Committee of the Council of Peoples' Deputies to the Ministry of Water resources of the Uzbek SSR and the Ministry of Water resources of the Kyrgyz SSR on water compensation for the non-used share of the Kyrgyz SSR from the Andijan reservoir |     | no date assumed 1980 | Water sharing, increased water supply, water compensation                              | 2                                 |
| 79.                                 | Annotation on allocation of water resources of the rivers of the Ferghana Valley between the Uzbek SSR and Kyrgyz SSR during the vegetation period of 1981 and other unresolved issues                                                                                                   |     | 1981                 | Water sharing, reconsidering shares                                                    | 2                                 |
| 80.                                 | Reference Certificate on the implementation of the Protocol dd. 10/04/1980 on inter-republican allocation of the runoff of the small rivers of the Ferghana Valley approved by the Deputy Minister of Water resources of the USSR and other inter-republican questions                   |     | 01 June 1981         | Water sharing, linking water resources, sharing responsibilities, reconsidering shares | 2                                 |
| 81.                                 | Stage Questions on Water related construction to the Uzbek SSR                                                                                                                                                                                                                           |     | 01 June 1981         | Water sharing, linking water resources, sharing responsibilities, reconsidering shares | 2                                 |
| 82.                                 | Protocol of the Meeting on the decadal allocation of the runoff of the Sokh STT, Shakhimardansai STT and Isfayramsai STT between the Uzbek and Kyrgyz SSRs                                                                                                                               |     | 14 June 1981         | Water sharing                                                                          | 2                                 |
| 83.                                 | Corrective Note to the Refined Scheme of the Complex Use and Protection of Syr Darya River Basin 1983. Ministry of Melioration and Water Resources of USSR, detailed in Protocol #413 dd. 29 February 1984, Sredazgiprovdokhlopok (in Russian).                                          |     | 1983                 | Further development of Scheme                                                          | 2                                 |
| 84.                                 | Scheduled water intake on filling and releasing the Papan reservoir on the Akburasai STT under 75% water supply                                                                                                                                                                          |     | no date              | Water sharing                                                                          | 2                                 |
| 85.                                 | Letter from Osh province WMD to Andijan province WMD on the clarification of the lands and water allocation from the Maylisai STT                                                                                                                                                        |     | 27 February 1985     | Water sharing, reconsidering shares                                                    | 2                                 |

Table S1. Cont.

| Chronological order of the document | Document <sup>1</sup>                                                                                                                                                                                                                                                                                                                                          | NO.     | Date               | Relevance to (Present) Benefit Sharing <sup>2</sup>                  | Type [4] of Benefits <sup>3</sup> |
|-------------------------------------|----------------------------------------------------------------------------------------------------------------------------------------------------------------------------------------------------------------------------------------------------------------------------------------------------------------------------------------------------------------|---------|--------------------|----------------------------------------------------------------------|-----------------------------------|
| 86.                                 | Letter from Andijan province WMD to Osh province WMD on the clarification of the lands and water allocation from the Maylisai STT                                                                                                                                                                                                                              |         | 15 March 1985      | Water sharing, reconsidering shares                                  | 2                                 |
| 87.                                 | Report on the design and construction of the Sokh reservoir, Ferghana province WMD                                                                                                                                                                                                                                                                             |         | 1986               | Water sharing, increased water supply                                | 2                                 |
| 88.                                 | Protocol of the Meeting on agreement on the volumes and deadlines for preparation of the documentation on design specification and estimates as well as for construction of the objects by the Ferghanavodstroy of the Uzbek SSR in compensation of the objects in the zone flooding by the Sokh reservoir in the territory of the Kyrgyz SSR                  |         | 9-12 February 1988 | Water sharing, increased water supply, compensation for resettlement | 2                                 |
| 89.                                 | Protocol of the Meeting on the process of designing and construction of the objects in the Aygultash settlement (Sokh reservoir) of Batken district of Osh province                                                                                                                                                                                            |         | 1-2 March 1988     | Water sharing, increased water supply, compensation for resettlement | 2                                 |
| 90.                                 | Protocol of the Meeting of the Technical Council of the Ministry of water resources of the Kyrgyz SSR                                                                                                                                                                                                                                                          | 1634    | 30 March 1989      | Water sharing, sharing responsibilities                              | 2                                 |
| 91.                                 | Protocol of the Meeting of the Parity Commission of the Uzbek SSR and the Kyrgyz SSR on regulation of the issues between sovkhoses Khushyor of Rishtan district of Ferghana province and Pervomayskiy of Batken district of Osh province                                                                                                                       |         | 17 June 1989       | Water sharing, reconsidering shares                                  | 2                                 |
| 92.                                 | Protocol of the Technical Meeting on regulation of the water management issues between the State Committee for water resources of the Uzbek SSR and the Ministry of water resources of the Kyrgyz SSR                                                                                                                                                          | 3       | 22 August 1989     | Water sharing, reconsidering shares                                  | 2                                 |
| 93.                                 | Protocol of the Meeting on the issues related to operations of the Tortgul reservoir on the Isfara STT and water sharing between Kyrgyzstan and Tajikistan. Osh province WMD                                                                                                                                                                                   |         | 16 May 1991        | Water sharing, increased water supply reconsidering shares           | 2                                 |
| 94.                                 | Letter from the Government of Uzbekistan to the Government of Kyrgyzstan on resuming the construction works of the Sokh reservoir                                                                                                                                                                                                                              | 30-5610 | 08 July 1993       | Water sharing, increased water supply, compensation for resettlement | 2                                 |
| 95.                                 | Letter from the Kadamjai district Water Management Department (WMD), Kyrgyzstan to the Osh province WMD, Ferghana province WMD, Ministry of Agriculture and Water Resources (MAWR) Kyrgyzstan on increasing water supply from the Isfayramsai, Shakhimardansai Small Transboundary Tributaries (STTs), Andijan reservoir, Left-shore Kampyr-Ravat canal (LSKR) | 87      | 08 June 1995       | Water sharing, reconsidering shares                                  | 2                                 |
| 96.                                 | Request from the Osh province Governor to the Osh province WMD to draft a letter to the Uzbek side with request to increase the share of Kyrgyzstan on STTs                                                                                                                                                                                                    |         | 22 January 1997    | Water sharing, reconsidering shares                                  | 2                                 |

Table S1. Cont.

| Chronological order of the document | Document <sup>1</sup>                                                                                                                                                                                                                                                           | NO.    | Date              | Relevance to (Present) Benefit Sharing <sup>2</sup> | Type [4] of Benefits <sup>3</sup> |
|-------------------------------------|---------------------------------------------------------------------------------------------------------------------------------------------------------------------------------------------------------------------------------------------------------------------------------|--------|-------------------|-----------------------------------------------------|-----------------------------------|
| 97.                                 | Schedule from the MAWR Kyrgyzstan to the MAWR Uzbekistan, Big Ferghana Canal (BFC) authority on the decadal water allocation of the Karkidon feeder canal                                                                                                                       | 06-166 | 04 April 1997     | Water sharing                                       | 2                                 |
| 98.                                 | Letter from the Osh province Basin WMD (BWMD) to the Andijan province WMD, BFC authority on increasing water supply from the Karkidon feeder canal                                                                                                                              |        | 28 July 1997      | Water sharing, reconsidering shares                 | 2                                 |
| 99.                                 | Letter (message) from Aravan district WMD to the Osh province BWMD                                                                                                                                                                                                              | 26     | 27 August 1997    | Water sharing                                       | 2                                 |
| 100.                                | Letter (message) from the BFC authority to the Osh province BWMD on water shortage and compensation of the BFC, South Ferghana Canal (SFC), Andijan reservoir, Karkidon feeder canal                                                                                            | 442    | 29 August 1997    | Water sharing                                       | 2                                 |
| 101.                                | Letter from the Ferghana province WMD to the Osh province BWMD on increasing water supply of the Karkidon feeder canal, Isfayramsai, Shakhimardansai STTs                                                                                                                       |        | 9 September 1997  | Water sharing, issue linkages                       | 2                                 |
| 102.                                | Report to the head of the Osh province WMD from the field monitor                                                                                                                                                                                                               |        | 10 September 1997 | Water sharing                                       | 2                                 |
| 103.                                | Letter from the Osh province WMD to the Ferghana province BWMD on increasing water supply of the Karkidon feeder canal                                                                                                                                                          |        | 10 September 1997 | Water sharing, issue linkages                       | 2                                 |
| 104.                                | Proposition of the Osh province WMD on reclamation of lands near the border with Tajikistan                                                                                                                                                                                     |        | 1997              | Irrigation expansion, borders                       | 2                                 |
| 105.                                | Letter from the Andijan province WMD to the Osh province administration on crossing the border for Operations and Management (O&M), bridge construction of the Savai canal                                                                                                      |        | 1998              | O&M, border crossing                                | 2                                 |
| 106.                                | Letter from the Jalalabad province administration to the Andijan province administration on crossing the border for transportation for flood control dam on the Karadarya                                                                                                       |        | 21 September 1999 | O&M, border crossing                                | 2                                 |
| 107.                                | Protocol of the work of the Inter-agency water management commission of Uzbekistan and Kyrgyzstan. Andijan province WMD                                                                                                                                                         |        | 19 March 2002     | O&M                                                 | 2                                 |
| 108.                                | Letter from the Andijan province WMD to the Osh province WMD on the O&M of the Andijan and Papan reservoirs                                                                                                                                                                     |        | 17 April 2002     | O&M                                                 | 2                                 |
| 109.                                | Protocol of the work of the Inter-agency water management commission on examining the dam of the Papan reservoir and estimation of the operational costs. Andijan province WMD                                                                                                  |        | 19 April 2002     | O&M                                                 | 2                                 |
| 110.                                | Protocol of the work of the Inter-agency water management commission on examining the impact of the Andijan reservoir on the surrounding lands and the condition of the runoff of the Karadarya and Yassi rivers of Uzgen district upstream the reservoir. Andijan province WMD |        | 03 June 2002      | O&M                                                 | 2                                 |
| 111.                                | Letter from the Osh province BWMD to the Andijan province WMD on the O&M of the Andijan reservoir                                                                                                                                                                               |        | 14 July 2002      | O&M                                                 | 2                                 |

Table S1. Cont.

| Chronological order of the document | Document <sup>1</sup>                                                                                                                                                                                            | NO.    | Date              | Relevance to (Present) Benefit Sharing <sup>2</sup> | Type [4] of Benefits <sup>3</sup> |
|-------------------------------------|------------------------------------------------------------------------------------------------------------------------------------------------------------------------------------------------------------------|--------|-------------------|-----------------------------------------------------|-----------------------------------|
| 112.                                | Letter from the Osh province BWMD to the MAWR Uzbekistan on the O&M of the Papan reservoir                                                                                                                       |        | 04 September 2002 | O&M                                                 | 2                                 |
| 113.                                | Letter from the Osh province BWMD to the Kyrgyzstan WMD on flood recovery of the Aravansai STT                                                                                                                   | 01-240 | 05 September 2002 | O&M                                                 | 2                                 |
| 114.                                | Letter from the Osh province BWMD to the Andijan province WMD on the O&M of the Andijan and Papan reservoirs                                                                                                     |        | 17 March 2003     | O&M                                                 | 2                                 |
| 115.                                | Letter from the Osh province BWMD to the Andijan province WMD on flood recovery of the RSKR canal                                                                                                                | 01-161 | 28 May 2003       | O&M                                                 | 2                                 |
| 116.                                | Letter from the Osh province BWMD to the Andijan province WMD on the O&M of the Andijan reservoir                                                                                                                |        | 11 June 2003      | O&M                                                 | 2                                 |
| 117.                                | Letter from the Naryn-Karadarya (NK) Basin Irrigation Systems Authority (BISA) to the Jalalabad BWMD on crossing the border for O&M of the Pump-stations                                                         |        | 24 February 2004  | O&M, border crossing                                | 2                                 |
| 118.                                | Letter from the NK BISA to the Jalalabad province, Nookent district Burgandy village administration on the O&M of the Nushkan canal, M 1-2 canal                                                                 |        | 25 February 2004  | O&M                                                 | 2                                 |
| 119.                                | Schedule from the NK BISA, MAWR Uzbekistan to the Jalalabad BWMD, Kyrgyzstan WMD on the decadal water allocation of the Suzak canal                                                                              |        | 16 April 2004     | Water sharing                                       | 2                                 |
| 120.                                | Schedule from the NK BISA, MAWR Uzbekistan to the Jalalabad BWMD, Kyrgyzstan WMD on the decadal water allocation of the Maylisai STT                                                                             |        | 16 April 2004     | Water sharing                                       | 2                                 |
| 121.                                | Schedule from the NK BISA, MAWR Uzbekistan to the Jalalabad BWMD, Kyrgyzstan WMD on the decadal water allocation of the RSKR canal                                                                               |        | 16 April 2004     | Water sharing                                       | 2                                 |
| 122.                                | Protocol on joint examination of operations and maintenance works of the Savai canal                                                                                                                             |        | 25 June 2004      | O&M                                                 | 2                                 |
| 123.                                | Letter from the NK BISA to the Jalalabad province, Nookent district administration, Jalalabad BWMD on the long-term use of lands by Uzbekistan and distribution by Kyrgyzstan of the lands in Jalalabad province |        | 13 August 2004    | Land use clarification                              | 2                                 |
| 124.                                | Letter from the Karadarya-Maylisai (KM) Irrigation Systems Authority (ISA) to the Regional Prosecutor of Osh, Jalalabad, Batken on the O&M of the Left-shore Naryn canal                                         | 104    | 24 November 2004  | O&M                                                 | 2                                 |
| 125.                                | Letter from the KM ISA to the Jalalabad province Interior affairs department on the O&M of the Left-shore Naryn canal                                                                                            |        | 24 November 2004  | O&M                                                 | 2                                 |
| 126.                                | Schedule from the NK BISA, MAWR Uzbekistan to the Jalalabad BWMD, Kyrgyzstan WMD on the decadal water allocation of the Akburasai STT                                                                            |        | 2004              | Water sharing                                       | 2                                 |

Table S1. Cont.

| Chronological order of the document | Document <sup>1</sup>                                                                                                                                            | NO.    | Date             | Relevance to (Present) Benefit Sharing <sup>2</sup> | Type [4] of Benefits <sup>3</sup> |
|-------------------------------------|------------------------------------------------------------------------------------------------------------------------------------------------------------------|--------|------------------|-----------------------------------------------------|-----------------------------------|
| 127.                                | Schedule from the NK BISA, MAWR Uzbekistan to the Jalalabad BWMD, Kyrgyzstan WMD on the decadal water allocation of the Savai canal                              |        | 2004             | Water sharing                                       | 2                                 |
| 128.                                | Schedule from the NK BISA, MAWR Uzbekistan to the Jalalabad BWMD, Kyrgyzstan WMD on the decadal water allocation of the Aravansai STT                            |        | 2004             | Water sharing                                       | 2                                 |
| 129.                                | Schedule from the NK BISA, MAWR Uzbekistan to the Jalalabad BWMD, Kyrgyzstan WMD on the decadal water allocation of the Savai canal                              |        | 2004             | Water sharing                                       | 2                                 |
| 130.                                | Letter from the Osh province BWMD to the NK BISA on the O&M of the Savai canal                                                                                   |        | March 2005       | O&M                                                 | 2                                 |
| 131.                                | Letter from the Osh province BWMD to the Syrdarya-Sokh (SS) BISA on increasing water supply of the Isfayramsai STT                                               |        | 07 April 2005    | Water sharing                                       | 2                                 |
| 132.                                | Letter from the Osh province BWMD to the NK BISA on the O&M of the Savai canal                                                                                   |        | 13 May 2005      | O&M                                                 | 2                                 |
| 133.                                | Letter from the Osh province BWMD to the Kyrgyzstan WMD on flood recovery of the Aravan district                                                                 | 01-132 | 17 June 2005     | O&M                                                 | 2                                 |
| 134.                                | Letter from the Osh province BWMD to the NK BISA on the O&M of the Savai canal                                                                                   |        | 25 June 2005     | O&M                                                 | 2                                 |
| 135.                                | Schedule from the NK BISA, MAWR Uzbekistan to the Jalalabad BWMD, Kyrgyzstan WMD on the Decadal water allocation of the Maylisai STT                             |        | 2005             | Water sharing                                       | 2                                 |
| 136.                                | Schedule from the NK BISA, MAWR Uzbekistan to the Jalalabad BWMD, Kyrgyzstan WMD on the Decadal water allocation of the Suzak canal                              |        | 2005             | Water sharing                                       | 2                                 |
| 137.                                | Schedule from the NK BISA, MAWR Uzbekistan to the Jalalabad BWMD, Kyrgyzstan WMD on the Decadal water allocation of the Right-shore Kampyr-Ravat (RSKR) canal    |        | 2005             | Water sharing                                       | 2                                 |
| 138.                                | Letter from the KM ISA to the Jalalabad province, Nookent district administration on crossing the border for O&M of the Dustlik and Mustakillik 8 yilligi canals |        | 15 July 2006     | O&M, border crossing                                | 2                                 |
| 139.                                | Letter from the NK BISA to the Jalalabad BWMD on crossing the border for O&M of the Pump-stations                                                                |        | 17 July 2006     | O&M, border crossing                                | 2                                 |
| 140.                                | Letter from the NK BISA to the Jalalabad BWMD on the Accident, O&M of the M 1-2 canal                                                                            |        | 11 October 2006  | O&M                                                 | 2                                 |
| 141.                                | Letter from the NK BISA to the Jalalabad BWMD on the O&M of the M 1-1 and M 1-2 canals of Dustlik pump-station                                                   |        | 25 October 2006  | O&M                                                 | 2                                 |
| 142.                                | Protocol of the negotiations of the government delegations of Uzbekistan and Tajikistan (on Kayrakkum)                                                           |        | 26 December 2006 | Water sharing, issue linkages                       | 2                                 |
| 143.                                | Letter from the NK BISA to the Osh BWMD on increasing water supply of the Akburasai and Aravansai STTs                                                           |        | 02 May 2008      | Water sharing                                       | 2                                 |

Table S1. Cont.

| Chronological order of the document | Document <sup>1</sup>                                                                                                                                                                                   | NO. | Date              | Relevance to (Present) Benefit Sharing <sup>2</sup> | Type [4] of Benefits <sup>3</sup> |
|-------------------------------------|---------------------------------------------------------------------------------------------------------------------------------------------------------------------------------------------------------|-----|-------------------|-----------------------------------------------------|-----------------------------------|
| 144.                                | Schedule from the NK BISA to the Jalalabad BWMD on the Decadal water allocation of the Maylisai STT                                                                                                     |     | 2008              | Water sharing                                       | 2                                 |
| 145.                                | Schedule from the NK BISA to the Jalalabad BWMD on the Decadal water allocation of the Druzhba pump-station                                                                                             |     | 2008              | Water sharing                                       | 2                                 |
| 146.                                | Letter from the Savai-Akbura (SA) ISA to the Aravan district Interior affairs department on crossing the border for O&M of the Aravansai STT                                                            |     | 30 January 2009   | O&M, border crossing                                | 2                                 |
| 147.                                | Schedule from the KM ISA, NK BISA to the Jalalabad BWMD on the Decadal water allocation of the Druzhba pump-station                                                                                     |     | 05 February 2009  | Water sharing                                       | 2                                 |
| 148.                                | Letter from the SA ISA to the Aravan district Interior affairs department on crossing the border for O&M of the Aravansai STT                                                                           |     | 16 March 2009     | O&M, border crossing                                | 2                                 |
| 149.                                | Letter from the SA ISA to the Aravan district Interior affairs department on crossing the border for O&M of the Aravansai STT                                                                           |     | 30 September 2009 | O&M, border crossing                                | 2                                 |
| 150.                                | Schedule from the NK BISA to the Jalalabad BWMD on the Decadal water allocation of the Pakhta-Abad canal from Karadarya river                                                                           |     | 2009              | Water sharing                                       | 2                                 |
| 151.                                | Report from the Jalalabad province WMD on the STTs. Jalalabad province WMD                                                                                                                              |     | 2009              | Water sharing, linked issues                        | 2                                 |
| 152.                                | Letter from the SA ISA to the Aravan district Interior affairs department on crossing the border for O&M of the Aravansai STT                                                                           |     | 30 January 2010   | O&M, border crossing                                | 2                                 |
| 153.                                | Letter from the SA ISA to the Osh province administration on flood, crossing the border of the Azimboy canal                                                                                            |     | May 2010          | O&M, border crossing                                | 2                                 |
| 154.                                | Letter from the SA ISA to the Aravan district WMD on flood, crossing the border of the Azimboy canal                                                                                                    |     | May 2010          | O&M, border crossing                                | 2                                 |
| 155.                                | Letter from the SA ISA to the Aravan district interior affairs department on flood, crossing the border of the Azimboy canal                                                                            |     | May 2010          | O&M, border crossing                                | 2                                 |
| 156.                                | Letter from the Jalalabad province, Nookent district administration to the Andijan province WMD (NK BISA) on crossing the border for O&M of the Pump-stations Druzhba, Mustakillik 8-yilligi, Madaniyat |     | 16 June 2010      | O&M, border crossing                                | 2                                 |
| 157.                                | Report from the Jalalabad province WMD on the STTs. Jalalabad province WMD                                                                                                                              |     | 2010              | Water sharing, linked issues                        | 2                                 |
| 158.                                | Letter from the KM ISA to the Shamaldisai Unit of the border authority of Kyrgyzstan on crossing the border for O&M of the M-1, M-1-1, M-1-2, Druzhba approach and pumping canals                       |     | 14 February 2011  | O&M, border crossing                                | 2                                 |

Table S1. Cont.

| Chronological order of the document | Document <sup>1</sup>                                                                                                                                                                                          | NO. | Date              | Relevance to (Present) Benefit Sharing <sup>2</sup> | Type [4] of Benefits <sup>3</sup> |
|-------------------------------------|----------------------------------------------------------------------------------------------------------------------------------------------------------------------------------------------------------------|-----|-------------------|-----------------------------------------------------|-----------------------------------|
| 159.                                | Letter from the KM ISA to the Jalalabad province, Nookent district Burgandy village administration on crossing the border for O&M of the M-1, M-1-1, M-1-2, Druzhba approach and pumping canals                |     | 14 February 2011  | O&M, border crossing                                | 2                                 |
| 160.                                | Letter from the KM ISA to the Jalalabad province, Customs authority on crossing the border for O&M of the M-1, M-1-1, M-1-2, Druzhba approach and pumping canals                                               |     | 14 February 2011  | O&M, border crossing                                | 2                                 |
| 161.                                | Letter from the KM ISA to the Jalalabad province, Nookent district administration on crossing the border for O&M of the M-1, M-1-1, M-1-2, Druzhba approach and pumping canals                                 |     | 14 February 2011  | O&M, border crossing                                | 2                                 |
| 162.                                | Letter from the SA ISA to the Aravan district Interior affairs department on crossing the border for O&M of the Aravansai STT                                                                                  |     | 21 February 2011  | O&M, border crossing                                | 2                                 |
| 163.                                | Letter from the SA ISA to the Aravan district Interior affairs department on crossing the border for O&M of the Aravansai STT                                                                                  |     | 08 April 2011     | O&M, border crossing                                | 2                                 |
| 164.                                | Letter from the SA ISA to the Aravan district administration on crossing the border for O&M of the Aravansai STT                                                                                               |     | 20 April 2011     | O&M, border crossing                                | 2                                 |
| 165.                                | Letter from the NK BISA to the Jalalabad BWMD on increasing water supply of the Maylisai STT                                                                                                                   |     | 10 July 2011      | Water sharing                                       | 2                                 |
| 166.                                | Letter from the NK BISA to the Nookent district administration on increasing water supply of the Maylisai STT                                                                                                  |     | 11 July 2011      | Water sharing                                       | 2                                 |
| 167.                                | Letter from the NK BISA to the Nookent district administration on increasing water supply of the Maylisai STT                                                                                                  |     | 04 August 2011    | Water sharing                                       | 2                                 |
| 168.                                | Letter from the NK BISA to the Jalalabad BWMD on increasing water supply of the Maylisai STT                                                                                                                   |     | 04 August 2011    | Water sharing                                       | 2                                 |
| 169.                                | Letter from the Jalalabad BWMD to the NK BISA on crossing the border for O&M of the RSKR canal                                                                                                                 |     | 12 September 2011 | O&M, border crossing                                | 2                                 |
| 170.                                | Letter from the Pump stations, energy and comm. dept. of NK BISA to the Jalalabad province, Nookent district administration on crossing the border for O&M of the Pump-stations Druzhba, Mustakillik 8-yilligi |     | 10 January 2012   | O&M, border crossing                                | 2                                 |
| 171.                                | Letter from the KM ISA to the Shamaldisai Unit of the border authority of Kyrgyzstan on crossing the border for O&M of the M-1, M-1-1, M-1-2, Druzhba approach and pumping canals                              |     | 17 January 2012   | O&M, border crossing                                | 2                                 |

Table S1. Cont.

| Chronological order of the document | Document <sup>1</sup>                                                                                                                                                                           | NO.      | Date             | Relevance to (Present) Benefit Sharing <sup>2</sup> | Type [4] of Benefits <sup>3</sup> |
|-------------------------------------|-------------------------------------------------------------------------------------------------------------------------------------------------------------------------------------------------|----------|------------------|-----------------------------------------------------|-----------------------------------|
| 172.                                | Letter from the KM ISA to the Jalalabad province, Customs authority on crossing the border for O&M of the M-1, M-1-1, M-1-2, Druzhba approach and pumping canals                                |          | 17 January 2012  | O&M, border crossing                                | 2                                 |
| 173.                                | Letter from the KM ISA to the Jalalabad province, Nookent district Burgandy village administration on crossing the border for O&M of the M-1, M-1-1, M-1-2, Druzhba approach and pumping canals |          | 17 January 2012  | O&M, border crossing                                | 2                                 |
| 174.                                | Letter from the Savai-Akbura (SA) ISA to the Osh province BWMD on the O&M of the Savai canal                                                                                                    | 01-09-18 | 27 February 2012 | O&M                                                 | 2                                 |
| 175.                                | Letter from the Andijan province administration to the Border Authority Sharq on crossing the border for O&M of the Pump-stations Druzhba, Mustakillik 8-yilligi                                |          | 31 March 2012    | O&M, border crossing                                | 2                                 |
| 176.                                | Letter from the Osh BWMD to the NK BISA on increasing water supply of the Kyzyl Bayraq canal                                                                                                    |          | 17 July 2012     | Water sharing                                       | 2                                 |
| 177.                                | Letter from the Osh BWMD to the NK BISA on increasing water supply of the Kyzyl Bayraq canal                                                                                                    |          | 08 August 2012   | Water sharing                                       | 2                                 |
| 178.                                | Schedule from the Unified authority of main canals, MAWR Uzbekistan to the Jalalabad BWMD, Kyrgyzstan WMD on the Decadal water allocation of the RSKR canal                                     |          | 2012             | Water sharing                                       | 2                                 |
| 179.                                | Schedule from the NK BISA, MAWR Uzbekistan to the Jalalabad BWMD, Kyrgyzstan WMD on the Decadal water allocation of the Pakhta-Abad canal from Karadarya river                                  |          | 2012             | Water sharing                                       | 2                                 |
| 180.                                | Schedule from the NK BISA, MAWR Uzbekistan to the Osh BWMD, Kyrgyzstan WMD on the Decadal water allocation of the Aravansai STT                                                                 |          | 2012             | Water sharing                                       | 2                                 |
| 181.                                | Schedule from the NK BISA, MAWR Uzbekistan to the Osh BWMD, Kyrgyzstan WMD on the Decadal water allocation of the Akburasai STT                                                                 |          | 2012             | Water sharing                                       | 2                                 |
| 182.                                | Schedule from the NK BISA, MAWR Uzbekistan to the Osh BWMD, Kyrgyzstan WMD on the Decadal water allocation of the Savai canal                                                                   |          | 2012             | Water sharing                                       | 2                                 |
| 183.                                | Report from the Osh province WMD on the shared water resources. Osh province WMD                                                                                                                |          | 2012             | Water sharing, linked issues                        | 2                                 |
| 184.                                | Report from the Ferghana province WMD on the STTs. Ferghana province WMD—Sirdarya-Sokh BISA (in Uzbek).                                                                                         |          | 2012             | Water sharing, linked issues                        | 2                                 |
| 185.                                | Report from the Jalalabad province WMD on the STTs. Jalalabad province WMD                                                                                                                      |          | 2012             | Water sharing, linked issues                        | 2                                 |
| 186.                                | Letter from the KM ISA to the Jalalabad province, Nookent district Burgandy village administration on crossing the border for O&M of the M-1, M-1-1, M-1-2, Druzhba approach and pumping canals |          | 01 February 2013 | O&M, border crossing                                | 2                                 |

Table S1. Cont.

| Chronological order of the document | Document <sup>1</sup>                                                                                                                                                                                   | NO. | Date             | Relevance to (Present) Benefit Sharing <sup>2</sup> | Type [4] of Benefits <sup>3</sup> |
|-------------------------------------|---------------------------------------------------------------------------------------------------------------------------------------------------------------------------------------------------------|-----|------------------|-----------------------------------------------------|-----------------------------------|
| 187.                                | Letter from the KM ISA to the Jalalabad province, Customs authority on crossing the border for O&M of the M-1, M-1-1, M-1-2, Druzhba approach and pumping canals                                        |     | 01 February 2013 | O&M, border crossing                                | 2                                 |
| 188.                                | Letter from the KM ISA to the Jalalabad province, Nookent district administration on crossing the border for O&M of the M-1, M-1-1, M-1-2, Druzhba approach and pumping canals                          |     | 01 February 2013 | O&M, border crossing                                | 2                                 |
| 189.                                | Letter from the Jalalabad province, Nookent district administration to the Andijan province WMD (NK BISA) on crossing the border for O&M of the Pump-stations Druzhba, Mustakillik 8-yilligi, Madaniyat |     | 2013             | O&M, border crossing                                | 2                                 |
| 190.                                | Report from the Jalalabad province WMD on the STTs. Jalalabad province WMD                                                                                                                              |     | 2013             | Water sharing, linked issues                        | 2                                 |

Notes: <sup>1</sup> The originals of documents are in Russian language unless otherwise stated; <sup>2</sup> Some pivotal, in the authors' opinion, documents which may have likely influenced the level of autonomy in decision making and strategic priorities are highlighted in grey; <sup>3</sup> Due to the great heterogeneity of the levels, actors, objects and other details involved, the results are descriptive and do not imply a numeric accuracy, on the same grounds the results are not aggregated.

Table S2. Agreements of the Central Asian states related to management of shared water resources after 1991.

| Chronological order of the document | Date             | Agreement/Institutional Arrangements                                                                                    | Purpose and Brief Content/Accomplishments                                                                                                                                                                                                                                                  | Basin and Governance Level                | Validity at Present               |
|-------------------------------------|------------------|-------------------------------------------------------------------------------------------------------------------------|--------------------------------------------------------------------------------------------------------------------------------------------------------------------------------------------------------------------------------------------------------------------------------------------|-------------------------------------------|-----------------------------------|
| 1.                                  | 18 February 1992 | Almaty Agreement on cooperation in the field of joint water resources management and conservation of interstate sources | To establish the ICWC, the two BWOs—Amu Darya and Syr Darya—property rights for the structures operated by these organizations. It was agreed to respect the existing pattern and principles of water allocation as well as acting regulations on water allocation from interstate sources | The entire Aral Sea basin, regional level | Yes                               |
| 2.                                  | 04 January 1993  | Decision of heads of the Central Asian states on creation of the International Fund for Saving the Aral Sea (IFAS)      | To establish an organization which would manage the funds of the member states and international donors                                                                                                                                                                                    | The entire Aral Sea basin, regional level | Updated by the Ashgabat Agreement |

Table S2. Cont.

| Chronological order of the document | Date              | Agreement/Institutional Arrangements                                                | Purpose and Brief Content/Accomplishments                                                                                                                                                                                                                                                                                                                                                                                                                                                                                 | Basin and Governance Level                                                                                                                                                    | Validity at Present               |
|-------------------------------------|-------------------|-------------------------------------------------------------------------------------|---------------------------------------------------------------------------------------------------------------------------------------------------------------------------------------------------------------------------------------------------------------------------------------------------------------------------------------------------------------------------------------------------------------------------------------------------------------------------------------------------------------------------|-------------------------------------------------------------------------------------------------------------------------------------------------------------------------------|-----------------------------------|
| 3.                                  | 26 March 1993     | Kzyl-Orda Agreement on Joint Activities in the Aral Sea Basin                       | To address environmental, social and economic issues in the basin. The Agreement established the Interstate Council on the problems of the Aral Sea basin (ICAS) which included: its Executive Committee located in Tashkent, Commission for Socio-Economic Development and Scientific, Technical and Environmental Cooperation (CSEDSTEC) and ICWC founded under the 1992 Agreement                                                                                                                                      | The entire Aral Sea basin, regional level: signed between heads of the five states, Russia is included as an observer with technical and financial assistance and cooperation | Updated by the Ashgabat Agreement |
| 4.                                  | 20 September 1995 | Nukus Declaration                                                                   | To confirm intentions and financial obligations towards the established interstate organizations                                                                                                                                                                                                                                                                                                                                                                                                                          | The entire Aral Sea basin, regional level                                                                                                                                     | Yes                               |
| 5.                                  | 28 February 1997  | Almaty Declaration                                                                  | To declare 1998 as the Year of protection of the environment in the region. The Declaration recognizes the need for ecosystem approach in managing the shared water resources                                                                                                                                                                                                                                                                                                                                             | The entire Aral Sea basin, regional level                                                                                                                                     | Yes                               |
| 6.                                  | 17 March 1998     | Bishkek Agreement on cooperation in the area of environment and rational nature use | To cooperate in the field of environmental protection, harmonize environmental laws, improve economic mechanisms and other measures                                                                                                                                                                                                                                                                                                                                                                                       | Three countries: Kazakhstan, Kyrgyzstan and Uzbekistan, regional level                                                                                                        | Yes                               |
| 7.                                  | 17 March 1998     | Syr Darya Framework Agreement                                                       | To create a framework where energy resources could be exchanged among the states. Summer hydropower from Kyrgyzstan (later from Tajikistan as well) to Uzbekistan and Kazakhstan, winter fossil fuels from Uzbekistan and Kazakhstan to Kyrgyzstan (and Tajikistan)                                                                                                                                                                                                                                                       | Kazakhstan, Kyrgyzstan and Uzbekistan signed the Agreement in 1998 and Tajikistan joined in 1999, regional level                                                              | No                                |
| 8.                                  | 09 April 1999     | Ashgabat Agreement on the status of the IFAS                                        | To define the new structure and status of the IFAS and its organizations, which included (1) Board of IFAS; (2) A revision Committee; (3) Executive Committee (EC); (4) Branches of EC of the IFAS in the states; (5) ICWC, with its Secretary, Scientific Information Center (SIC ICWC), Basin Water Management Organizations (BWO) Amu Darya and Syr Darya; (6) The Commission on the Sustainable Development (CSD) with its Secretary, Scientific Information Center at Institute of Deserts of Turkmenistan (SIC CSD) | The entire Aral Sea basin, regional level                                                                                                                                     | Yes                               |
| 9.                                  | 09 April 1999     | Ashgabat Declaration                                                                | To re-affirm the continuation of joint actions to address environmental problems and issues related to use of natural resources. In particular, the Declaration commits more consideration to the problems of mountain territories zones of the rivers flow formation                                                                                                                                                                                                                                                     | The entire Aral Sea basin, regional level                                                                                                                                     | Yes                               |

Table S2. Cont.

| Chronological order of the document | Date            | Agreement/Institutional Arrangements                                   | Purpose and Brief Content/Accomplishments                                                                                                                                                                     | Basin and Governance Level                                                     | Validity at Present |
|-------------------------------------|-----------------|------------------------------------------------------------------------|---------------------------------------------------------------------------------------------------------------------------------------------------------------------------------------------------------------|--------------------------------------------------------------------------------|---------------------|
| 10.                                 | 17 June 1999    | Bishkek Agreement on hydro-meteorology                                 | To harmonize the activities in the field of hydro-meteorology                                                                                                                                                 | Four countries: Kazakhstan, Kyrgyzstan, Tajikistan, Uzbekistan, regional level | Yes                 |
| 11.                                 | 17 June 1999    | Bishkek Agreement on parallel operation of the national energy systems | To set up a common coordinated energy platform, which in parallel with the existing agreements on water and energy (Syr Darya Framework Agreement), was supposed to synchronize joint activities in the field | Four countries: Kazakhstan, Kyrgyzstan, Tajikistan, Uzbekistan, regional level | No                  |
| 12.                                 | 21 January 2000 | Astana Agreement—Chu Talas                                             | To establish a framework to jointly manage the rivers Chu and Talas shared by the Kyrgyzstan and Kazakhstan                                                                                                   | Two countries: Kazakhstan and Kyrgyzstan, regional level                       | Yes                 |
| 13.                                 | 06 October 2002 | Dushanbe Declaration                                                   | To define the main directions in addressing problems related to the Aral Sea basin, improve monitoring and information sharing systems among the countries                                                    | The entire Aral Sea basin, regional level                                      | Yes                 |

**Table S3.** Main characteristics of the transboundary infrastructure constructed in the period from 1924 to 2013 in Andijan and Ferghana provinces of Uzbekistan shared with Batken, Jalalabad, Osh provinces of Kyrgyzstan and Sogd province of Tajikistan, adapted from [27].

| Name of the Infrastructure | Infra-structure Type | Water Flow Capacity, m <sup>3</sup> /s | Date of Construc-tion | Budget of Which Country | Total Length (canals), km | Length Located in Other Country, km | Total Command Area, ha | Area in Other Country, ha | District Served Own Country | District Served Other Country | Who Operated during Soviet Union | Who Owns Today or Operates | How Many Times Crosses the Border | Location of Headwork/ Infra-Structure |
|----------------------------|----------------------|----------------------------------------|-----------------------|-------------------------|---------------------------|-------------------------------------|------------------------|---------------------------|-----------------------------|-------------------------------|----------------------------------|----------------------------|-----------------------------------|---------------------------------------|
| Period from 1920S to 1953  |                      |                                        |                       |                         |                           |                                     |                        |                           |                             |                               |                                  |                            |                                   |                                       |
| Chimgansay                 | S                    | 20                                     | 1924                  | UZ                      | 13.2                      | 10.89                               | 285                    | 0                         | Ferghana (UZ)               | Kadamjay (KG)                 | F-R (UZ)                         | F-B of I-Sh ISA (UZ)       | 1                                 | KG                                    |
| Arabtepasay                | S                    | 6                                      | 1924                  | UZ                      | 26.4                      | 12.58                               | 1,944                  | 300                       | Ferghana (UZ)               | Kadamjay (KG)                 | I-Sh DICFC (UZ)                  | I-Sh ISA (UZ)              | 3                                 | KG                                    |
| Altariksay                 | S                    | 40                                     | 1924                  | UZ                      | 13.3                      | 12.12                               | 4,520                  | 0                         | Ferghana (UZ)               | Kadamjay (KG)                 | I-Sh DICFC (UZ)                  | I-Sh ISA (UZ)              | 1                                 | UZ                                    |
| Eski Fayziabadsai          | S                    | 10                                     | 1924                  | UZ                      | 29.3                      | 6.6                                 | 6,375                  | 0                         | Ferghana (UZ)               | Kadamjay (KG)                 | I-Sh DICFC (UZ)                  | I-Sh ISA (UZ)              | 4                                 | UZ                                    |
| Hilla Canal                | IC                   | 13                                     | 1934                  | UZ                      | 11.2                      | 7.2                                 | 5,980                  | 2,500                     | Pakhtaabad (UZ)             | Nookent (KG)                  | M-S MIDC (UZ)                    | K-M ISA (UZ))              | 1                                 | KG                                    |
| Kuykulak Canal             | IC                   | 6                                      | 1934                  | UZ                      | 4                         | 1.2                                 | 3,556                  | 0                         | Pakhtaabad (UZ)             | Nookent (KG)                  | M-S MIDC (UZ)                    | K-M ISA (UZ)               | 1                                 | KG                                    |
| Savai Canal                | IC                   | 30                                     | 1936                  | UZ                      | 55.9                      | 28.5                                | 17,000                 | 3500                      | Kurgantepa (UZ)             | Karasuy (KG)                  | P-R (UZ)                         | K-M ISA (UZ)               | 1                                 | UZ                                    |

Table S3. Cont.

| Name of the Infrastructure             | Infra-structure Type | Water Flow Capacity, m³/s | Date of Construc-tion | Budget of Which Country | Total Length (canals), km | Length Located in Other Country, km | Total Command Area, ha             | Area in Other Country, ha          | District Served Own Country  | District Served Other Country | Who Operated during Soviet Union | Who Owns Today or Operates | How Many Times Crosses the Border | Location of Headwork/ Infra-Structure |
|----------------------------------------|----------------------|---------------------------|-----------------------|-------------------------|---------------------------|-------------------------------------|------------------------------------|------------------------------------|------------------------------|-------------------------------|----------------------------------|----------------------------|-----------------------------------|---------------------------------------|
| Rovot water distribution facility      | WO                   | 60                        | 1936                  | UZ                      | n/a                       | n/a                                 | n/a                                | n/a                                | Besharyk (UZ)                | Konibodom (TJ)                | B-R (UZ)                         | Isfara-Syr ISA (UZ)        | 0                                 | TJ                                    |
| Rapkon Main Canal                      | IC                   | 4                         | 1936                  | UZ                      | 2                         | 1                                   | 682                                | 0                                  | Besharyk (UZ)                | Isfara (TJ)                   | B-R (UZ)                         | Isfara-Syr ISA (UZ)        | 1                                 | TJ                                    |
| Logon Canal                            | IC                   | 16                        | 1937                  | UZ                      | 29.5                      | 15.9                                | 16,000                             | 4,000                              | Ferghana (UZ)                | Kadamjay (KG)                 | I-Sh DICFC (UZ)                  | I-Sh ISA (UZ)              | 2                                 | KG-UZ                                 |
| Ferghana Canal                         | IC                   | 1.5                       | 1946                  | UZ                      | 4.8                       | 3                                   | 1,200                              | 0                                  | Ferghana (UZ)                | Kadamjay (KG)                 | I-Sh DICFC (UZ)                  | I-Sh ISA (UZ)              | 1                                 | KG                                    |
| SUB-TOTAL:                             |                      | 206.5                     |                       |                         | 189.6                     | 98.99                               | 57,542                             | 10,300                             |                              |                               |                                  |                            |                                   | 6 in KG, 4 in UZ, 2 in TJ             |
| Period from 1953 to 1970               |                      |                           |                       |                         |                           |                                     |                                    |                                    |                              |                               |                                  |                            |                                   |                                       |
| Madaniyat Pumping Canal                | IC                   | 3                         | 1958                  | UZ                      | 11.9                      | 2.4                                 | 1600                               | 500                                | Pakhtaabad (UZ)              | Nookent (KG)                  | M-S MIDC (UZ)                    | K-M ISA (UZ)               | 1                                 | KG                                    |
| Madaniyat-1                            | PS                   | 0.72                      | 1958                  | UZ                      | n/a                       | n/a                                 | see Madaniyat Pumping Canal        | see Madaniyat Pumping Canal        | Pakhtaabad (UZ)              | Nookent (KG)                  | M-S MIDC (UZ)                    | K-M ISA (UZ)               | 0                                 | UZ                                    |
| Sokh-Shakhimardan                      | IC                   | 30                        | 1959                  | UZ                      | 30.5                      | 18.2                                | 16,000                             | 3,000                              | Rishtan (UZ), Oltiariq (UZ)  | Kadamjay (KG)                 | S-O DICFC (UZ)                   | S-O ISA (UZ)               | 1                                 | UZ                                    |
| Mustakillik 8 Yilligi Approach Canal   | WO                   | 11                        | 1960                  | UZ                      | 8.8                       | 2.3                                 | 420                                | n/a                                | Pakhtaabad (UZ)              | Nookent (KG)                  | M-S MIDC (UZ)                    | K-M ISA (UZ)               | 1                                 | KG                                    |
| Uz. Mustakillik 8 Yilligi, 1-elevation | PS                   | 8.4                       | 1960                  | UZ                      | n/a                       | n/a                                 | see M-1-1 and M-1-2 Pumping Canals | see M-1-1 and M-1-2 Pumping Canals | Pakhtaabad and Izbaskan (UZ) | Nookent (KG)                  | M-S MIDC (UZ)                    | K-M ISA (UZ)               | 0                                 | KG                                    |

Table S3. Cont.

| Name of the Infrastructure             | Infra-structure Type | Water Flow Capacity, m³/s | Date of Construc-tion | Budget of Which Country | Total Length (canals), km | Length Located in Other Country, km | Total Command Area, ha             | Area in Other Country, ha          | District Served Own Country | District Served Other Country | Who Operated during Soviet Union | Who Owns Today or Operates | How Many Times Crosses the Border | Location of Headwork/ Infra-Structure |
|----------------------------------------|----------------------|---------------------------|-----------------------|-------------------------|---------------------------|-------------------------------------|------------------------------------|------------------------------------|-----------------------------|-------------------------------|----------------------------------|----------------------------|-----------------------------------|---------------------------------------|
| Uz. Mustakillik 8 Yilligi, 2-elevation | PS                   | 0.8                       | 1960                  | UZ                      | n/a                       | n/a                                 | see M-1-1 and M-1-2 Pumping Canals | see M-1-1 and M-1-2 Pumping Canals | Izbaskan (UZ)               | Nookent (KG)                  | M-S MIDC (UZ)                    | K-M ISA (UZ)               | 0                                 | KG                                    |
| Khurromobod Canal                      | IC                   | 1.5                       | 1960                  | UZ                      | 2.39                      | 2.4                                 | 1,135                              | 0                                  | Rishtan (UZ)                | Kadamjay (KG)                 | S-O DICFC (UZ)                   | S-O ISA (UZ)               | 1                                 | KG                                    |
| Kishtut Canal                          | WF                   | 0.6                       | 1961                  | UZ                      | 1.2                       | 1.2                                 | 520                                | 0                                  | Sokh (UZ)                   | Kadamjay (KG)                 | S-R (UZ)                         | S-B of S-O ISA (UZ)        | 1                                 | KG                                    |
| Tayon Canal                            | IC                   | 0.3                       | 1962                  | UZ                      | 0.2                       | 0.2                                 | 120                                | 0                                  | Sokh (UZ)                   | Kadamjay (KG)                 | S-R (UZ)                         | S-B of S-O ISA (UZ)        | 1                                 | KG                                    |
| M-1 Pumping Canal                      | WO                   | 9                         | 1962                  | UZ                      | 1.8                       | 1.8                                 | 0                                  | 0                                  | Izbaskan (UZ)               | Nookent (KG)                  | M-S MIDC (UZ)                    | K-M ISA (UZ)               | 1                                 | KG                                    |
| M-1-1 Pumping Canal                    | IC                   | 3.8                       | 1962                  | UZ                      | 7.6                       | 7.6                                 | 3,100                              | 300                                | Pakhtaabad (UZ)             | Nookent (KG)                  | M-S MIDC (UZ)                    | K-M ISA (UZ)               | 1                                 | KG                                    |
| M-1-2 Pumping Canal                    | IC                   | 6                         | 1962                  | UZ                      | 8.6                       | 8.6                                 | 3,759                              | 200                                | Pakhtaabad (UZ)             | Nookent (KG)                  | M-S MIDC (UZ)                    | K-M ISA (UZ)               | 1                                 | KG                                    |
| Navruz Canal                           | IC                   | 3.5                       | 1964                  | UZ                      | 10                        | 7                                   | 752                                | 0                                  | Rishtan (UZ)                | Kadamjay (KG)                 | S-O DICFC (UZ)                   | S-O ISA (UZ)               | 1                                 | KG                                    |
| Tashlak Canal                          | IC                   | 3                         | 1966                  | UZ                      | 8.1                       | 0.8                                 | 650                                | 50                                 | Pakhtaabad (UZ)             | Nookent (KG)                  | M-S MIDC (UZ)                    | K-M ISA (UZ)               | 1                                 | KG                                    |
| Dustlik                                | PS                   | 8.4                       | 1969                  | UZ                      | n/a                       | n/a                                 | see Dustlik Pumping Canal          | see Dustlik Pumping Canal          | Pakhtaabad and Izbaskan(UZ) | Nookent (KG)                  | M-S MIDC (UZ)                    | K-M ISA (UZ)               | 0                                 | KG                                    |
| SUB-TOTAL: 1953-1969                   |                      | 90.02                     |                       |                         | 91.09                     | 52.5                                | 28,056                             | 4,050                              |                             |                               |                                  |                            |                                   | 13 in KG, 3 in UZ                     |
| Period in 1970s                        |                      |                           |                       |                         |                           |                                     |                                    |                                    |                             |                               |                                  |                            |                                   |                                       |
| Dustlik Approach Canal                 | WO                   | 18.0                      | 1970                  | UZ                      | 13.5                      | 13.5                                | 5,978                              | 1,895                              | Pakhtaabad and Izbaskan(UZ) | Nookent (KG)                  | M-S MIDC (UZ)                    | K-M ISA (UZ)               | 1                                 | KG                                    |
| Dustlik Pumping Canal                  | IC                   | 9.5                       | 1970                  | UZ                      | 19                        | 10.9                                | 7,769                              | 2,700                              | Pakhtaabad and Izbaskan(UZ) | Nookent (KG)                  | M-S MIDC (UZ)                    | K-M ISA (UZ)               | 1                                 | KG                                    |
| Dustlik Emergency Spillway             | FC                   | 11.5                      | 1970                  | UZ                      | 7.4                       | 7.4                                 | 0                                  | 0                                  | Pakhtaabad and Izbaskan(UZ) | Nookent (KG)                  | M-S MIDC (UZ)                    | K-M ISA (UZ)               | 1                                 | KG                                    |
| Koshkaryon Flood controlling dam       | FC                   | 15.0                      | 1970                  | UZ                      | 2.7                       | 2.7                                 | n/a                                | n/a                                | Rishtan (UZ)                | Kadamjay (KG)                 | R-R (UZ)                         | R-B of S-O ISA (UZ)        | 1                                 | KG                                    |
| Jyda Canal PPO+00-38-00                | IC                   | 2.0                       | 1974                  | UZ                      | 3.81                      | 3.81                                | 905                                | 0                                  | Ferghana (UZ)               | Kadamjay (KG)                 | F-R (UZ)                         | F-B of I-Sh ISA (UZ)       | 0                                 | KG                                    |

Table S3. Cont.

| Name of the Infrastructure       | Infra-structure Type | Water Flow Capacity, m <sup>3</sup> /s | Date of Construc-tion | Budget of Which Country | Total Length (canals), km | Length Located in Other Country, km | Total Command Area, ha      | Area in Other Country, ha   | District Served Own Country | District Served Other Country | Who Operated during Soviet Union | Who Owns Today or Operates | How Many Times Crosses the Border | Location of Headwork/ Infra-Structure |
|----------------------------------|----------------------|----------------------------------------|-----------------------|-------------------------|---------------------------|-------------------------------------|-----------------------------|-----------------------------|-----------------------------|-------------------------------|----------------------------------|----------------------------|-----------------------------------|---------------------------------------|
| Mindon 1 flood controlling dam   | FC                   | 1.5                                    | 1978                  | UZ                      | 2.5                       | 1.3                                 | n/a                         | n/a                         | Ferghana (UZ)               | Kadamjay (KG)                 | I-Sh DICFC (UZ)                  | I-Sh ISA (UZ)              | 0                                 | KG                                    |
| Mindon 2 flood controlling dam   | FC                   | 1.5                                    | 1978                  | UZ                      | 2                         | 1.2                                 | n/a                         | n/a                         | Ferghana (UZ)               | Kadamjay (KG)                 | I-Sh DICFC (UZ)                  | I-Sh ISA (UZ)              | 0                                 | KG                                    |
| Sub-total: 1970s                 |                      | 59                                     |                       |                         | 50.91                     | 40.81                               | 14,652                      | 4,595                       |                             |                               |                                  |                            |                                   | 7 in KG                               |
| Period from 1980 to 1991         |                      |                                        |                       |                         |                           |                                     |                             |                             |                             |                               |                                  |                            |                                   |                                       |
| Suzok-5                          | IC                   | 0.5                                    | 1987                  | UZ                      | 0.95                      | 0.95                                | 362                         | 0                           | Pakhtaabad (UZ)             | Bazarkurgan (KG)              | M-S MIDC (UZ)                    | K-M ISA (UZ)               | 1                                 | KG                                    |
| Kurgantepa Canal                 | IC                   | 2.0                                    | 1988                  | UZ                      | 5.17                      | 1.3                                 | 528                         | 0                           | Ferghana (UZ)               | Kadamjay (KG)                 | F-R (UZ)                         | F-B of I-Sh ISA (UZ)       | 2                                 | UZ                                    |
| Khalmiyon flood controlling dam  | FC                   | 7.5                                    | 1988                  | UZ                      | 3.2                       | 3.2                                 | n/a                         | n/a                         | Ferghana (UZ)               | Kadamjay (KG)                 | I-Sh DICFC (UZ)                  | I-Sh ISA (UZ)              | 0                                 | KG                                    |
| Kurgantepa flood controlling dam | FC                   | 2.0                                    | 1988                  | UZ                      | 15.7                      | 1.3                                 | n/a                         | n/a                         | Ferghana (UZ)               | Kadamjay (KG)                 | I-Sh DICFC (UZ)                  | I-Sh ISA (UZ)              | 0                                 | KG                                    |
| Mindon flood controlling dam     | FC                   | 14.0                                   | 1990                  | UZ                      | 3.3                       | 3.3                                 | n/a                         | n/a                         | Ferghana (UZ)               | Kadamjay (KG)                 | I-Sh DICFC (UZ)                  | I-Sh ISA (UZ)              | 0                                 | KG                                    |
| Sub-total: 1980-1990             |                      | 26                                     |                       |                         | 28.32                     | 10.05                               | 890                         | 0                           |                             |                               |                                  |                            |                                   | 4 in KG, 1 in UZ                      |
| Period from 1991 to Present      |                      |                                        |                       |                         |                           |                                     |                             |                             |                             |                               |                                  |                            |                                   |                                       |
| Yarkuton flood controlling dam   | FC                   | 20.0                                   | 1992                  | UZ                      | 8.1                       | 8                                   | n/a                         | n/a                         | Ferghana (UZ)               | Kadamjay (KG)                 | I-Sh DICFC (UZ)                  | I-Sh ISA (UZ)              | 0                                 | KG                                    |
| Kanda flood water dumping        | FC                   | 25.0                                   | 1999                  | UZ                      | 1                         | 1                                   | n/a                         | n/a                         | Ferghana (UZ)               | Kadamjay (KG)                 | I-Sh DICFC (UZ)                  | I-Sh ISA (UZ)              | 0                                 | KG                                    |
| Madaniyat-2                      | PS                   | 0.72                                   | 2006                  | UZ                      | n/a                       | n/a                                 | see Madaniyat Pumping Canal | see Madaniyat Pumping Canal | Pakhtaabad (UZ)             | Nookent (KG)                  | M-S MIDC (UZ)                    | K-M ISA (UZ)               | 0                                 | KG                                    |
| Sub-total: ]1991-present         |                      | 45.72                                  |                       |                         | 9.1                       | 9                                   | 0                           | 0                           |                             |                               |                                  |                            |                                   | 3 in KG                               |
| Total                            |                      | 427.24                                 |                       |                         | 369.02                    | 211.35                              | 101,140                     | 18,945                      |                             |                               |                                  |                            |                                   | 37 in KG, 8 in UZ, 2 in TJ            |

**Abbreviations**

B-R: Besharyk Rayvodkhoz; DICFC: Department of Inter-Collective Farm canals; F-B: Ferghana Branch; FC: Flood control and dam; F-R: Ferghana Rayvodkhoz; IC: Irrigation Canal; ISA: Irrigation System Authority; Isfara-Syr: Isfara-Syr Darya; I-Sh: Isfayram-Shahimardan; KG: Kyrgyz Republic; K-M: Karadarya–Maylisai; Mid Srh: Mid-Sharikhan; MIDC: Management of Inter-District Canals; M-S: Maylisai; PC: Pump Canal; P-R: Pakhtaabad Rayvodkhoz; PS: Pump station; R-B: Rishtan Branch; R-R: Rishtan Rayvodkhoz; S: Small River; S-A: Savay-Akbura; S-B: Sokh Branch; S-O: Sokh-Oktepa; S-R: Sokh Rayvodkhoz; TJ: Republic of Tajikistan; Up Srh: Upper Sharikhan; UZ: Republic of Uzbekistan; WF: Water flume meters; WO: Water Outlets.

© 2015 by the authors; licensee MDPI, Basel, Switzerland. This article is an open access article distributed under the terms and conditions of the Creative Commons Attribution license (<http://creativecommons.org/licenses/by/4.0/>).
